# Supplementary material
Source: ML conference proceedings conference paper supplement (https://openaccess.thecvf.com/content/CVPR_2019/html/Li_Object-Driven_Text-To-Image_Synthesis_CVPR_2019_paper.html)
Supplement: Supplementary file 1 [file Li_Object-Driven_Text-To-Image_Synthesis_CVPR_2019_supplemental.pdf]

# Object-driven Text-to-Image Synthesis via Adversarial Training

## 1. Comparison between Obj-GAN and the Ablative Versions

In this section, we show more images generated by our Obj-GAN and its ablative versions on the COCO dataset. There are more comparisons between the cases with or without spectral normalization in the discriminators, which can be found that there are no obvious improvement on the visual quality when we choose to use the spectral normalization.

| Real Image                                             | P-AttnGAN | P-AttnGAN w/ Lyt | Obj-GAN w/ SN | Obj-GAN | Real Image                                                   | P-AttnGAN | P-AttnGAN w/ Lyt | Obj-GAN w/ SN | Obj-GAN |
|--------------------------------------------------------|-----------|------------------|---------------|---------|--------------------------------------------------------------|-----------|------------------|---------------|---------|
|                                                        |           |                  |               |         |                                                              |           |                  |               |         |
| Green park bench in front of a tree on a sunny day.    |           |                  |               |         | An old building with Victoria University in the background.  |           |                  |               |         |
|                                                        |           |                  |               |         |                                                              |           |                  |               |         |
| A big ship is traveling on the water.                  |           |                  |               |         | A room has a couch, chair and table in it.                   |           |                  |               |         |
|                                                        |           |                  |               |         |                                                              |           |                  |               |         |
| Two dogs in the park on a cold day.                    |           |                  |               |         | A herd of sheep standing on a grass covered hillside.        |           |                  |               |         |
|                                                        |           |                  |               |         |                                                              |           |                  |               |         |
| A zebra standing in a brush filled field.              |           |                  |               |         | A cat that is laying down on a bed.                          |           |                  |               |         |
|                                                        |           |                  |               |         |                                                              |           |                  |               |         |
| An elephant looking at the camera in a pin.            |           |                  |               |         | The cat is laying on a luggage bag.                          |           |                  |               |         |
|                                                        |           |                  |               |         |                                                              |           |                  |               |         |
| Three elephants walk alongside and in a body of water. |           |                  |               |         | A cross country skier traveling down a slight slope.         |           |                  |               |         |
|                                                        |           |                  |               |         |                                                              |           |                  |               |         |
| A large plane about to land by the beach.              |           |                  |               |         | A sheep in the dirt with a green hill behind.                |           |                  |               |         |
|                                                        |           |                  |               |         |                                                              |           |                  |               |         |
| Two zebra grazing on grass in an open field.           |           |                  |               |         | A couple of girls playing a soccer on a field.               |           |                  |               |         |
|                                                        |           |                  |               |         |                                                              |           |                  |               |         |
| Two elephants walking through a lush green field.      |           |                  |               |         | A cat looking at its reflection in a mirror next to a shelf. |           |                  |               |         |



| Real Image                                                        | P-AttnGAN | P-AttnGAN w/ Lvt | Obj-GAN w/ SN | Obj-GAN | Real Image                                                   | P-AttnGAN | P-AttnGAN w/ Lvt | Obj-GAN w/ SN | Obj-GAN |
|-------------------------------------------------------------------|-----------|------------------|---------------|---------|--------------------------------------------------------------|-----------|------------------|---------------|---------|
|                                                                   |           |                  |               |         |                                                              |           |                  |               |         |
| A polo player on a horse following the ball on the ground.        |           |                  |               |         | Pizza with tomato and green olives being cut by a big knife. |           |                  |               |         |
|                                                                   |           |                  |               |         |                                                              |           |                  |               |         |
| A parking meter that reads "fail" and a white car across from it. |           |                  |               |         | A cat is lying on top of a suitcase.                         |           |                  |               |         |
|                                                                   |           |                  |               |         |                                                              |           |                  |               |         |
| A group of scattered sheep move down a country path.              |           |                  |               |         | A slice of casserole with steamed broccoli on a plate.       |           |                  |               |         |
|                                                                   |           |                  |               |         |                                                              |           |                  |               |         |
| A couple of people in a field flying kites.                       |           |                  |               |         | Skier in mid jump on mountain with poles extended.           |           |                  |               |         |
|                                                                   |           |                  |               |         |                                                              |           |                  |               |         |
| A train traveling down the rail road tracks.                      |           |                  |               |         | A small two toned blue airplane flying.                      |           |                  |               |         |
|                                                                   |           |                  |               |         |                                                              |           |                  |               |         |
| The bed and desk in a modern hotel room.                          |           |                  |               |         | A cat plays with grass outside in the garden.                |           |                  |               |         |
|                                                                   |           |                  |               |         |                                                              |           |                  |               |         |
| A kitchen area with a sink, refrigerator, and stove.              |           |                  |               |         | Boys are playing a soccer game on a field.                   |           |                  |               |         |
|                                                                   |           |                  |               |         |                                                              |           |                  |               |         |
| A neatly made bed with a red sheet.                               |           |                  |               |         | A large air plane on a run way.                              |           |                  |               |         |
|                                                                   |           |                  |               |         |                                                              |           |                  |               |         |
| Closeup of a cat in a bathroom sink.                              |           |                  |               |         | A park bench on a grassy green hillside.                     |           |                  |               |         |
|                                                                   |           |                  |               |         |                                                              |           |                  |               |         |
| A living room has a beige couch, and carpet.                      |           |                  |               |         | A couple of people stand on a rocky hill top.                |           |                  |               |         |



## 2. Attention Maps Generated by P-AttnGAN and Obj-GAN

We visualize more attention maps generated by P-AttnGAN and Obj-GAN as the supplementary for Figure 8 in the submission.

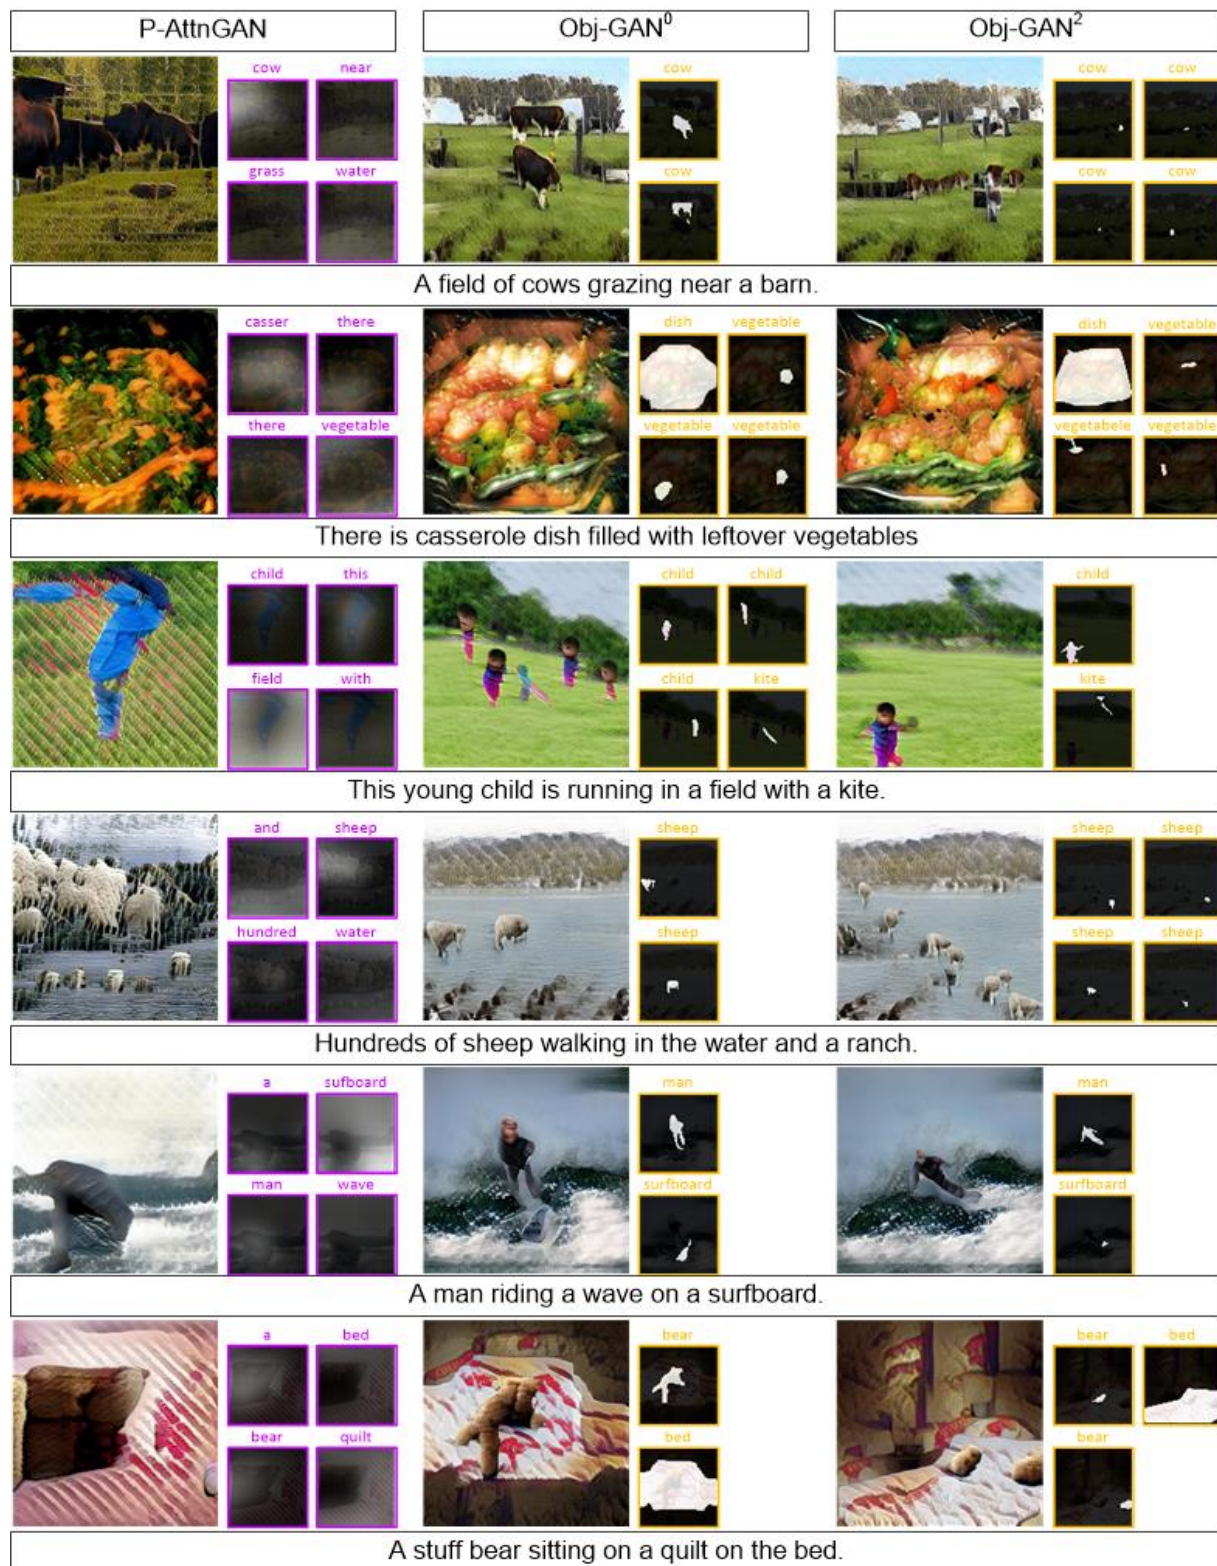



### 3. Results of Obj-GAN based on the Ground-truth Boxes and Shapes

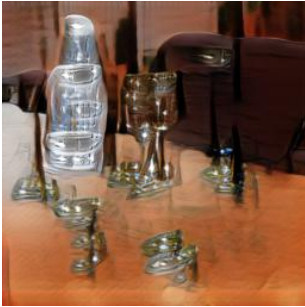

(1) A glass table with a bottle and glass of wine next to a chair.

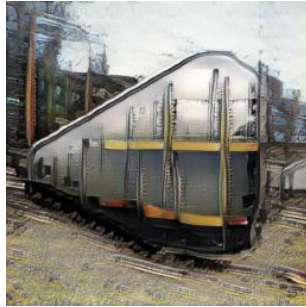

(2) A train sitting on some tracks next to a sidewalk.

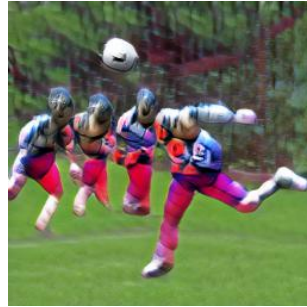

(3) Soccer player wearing green and orange hitting soccer ball.

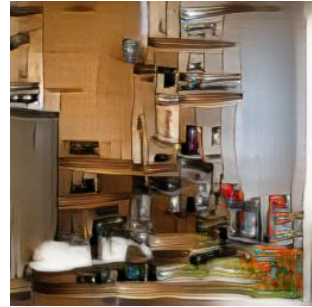

(4) A kitchen with a very messy counter space.

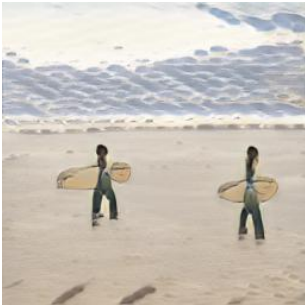

(5) The people are on the beach getting ready to surf.

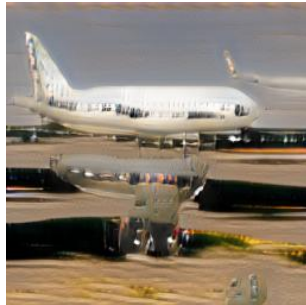

(6) A jet airliner waits its turn on the runway.

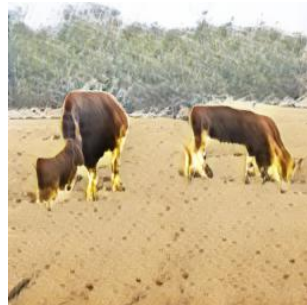

(7) Two cows are grazing in a dirt field.

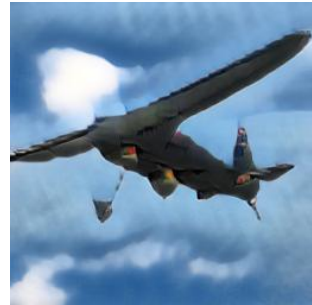

(8) A small lightweight airplane flying through the sky.

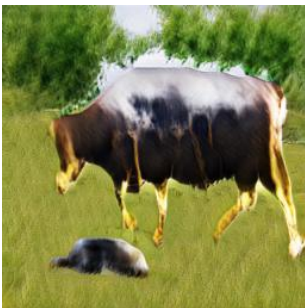

(9) A cow running in a field next to a dog.

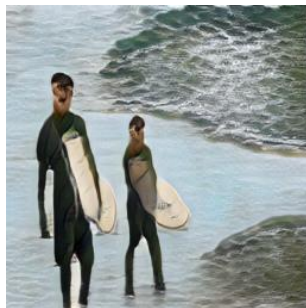

(10) Two people go into the water with their surfboards.

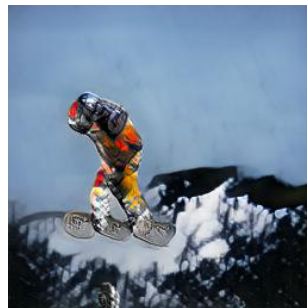

(11) A man in a helmet jumps a snowboard.

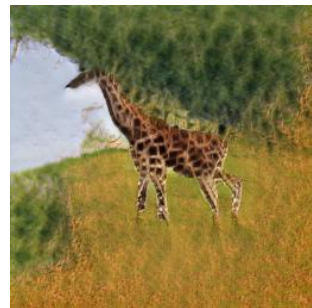

(12) A giraffe is standing all alone in a grassy area.

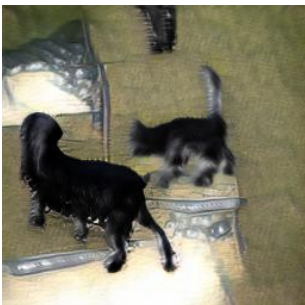

(13) The black dog is staring at the cat.

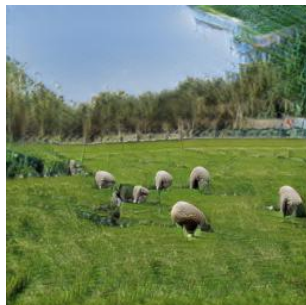

(14) A bunch of sheep are standing in a field.

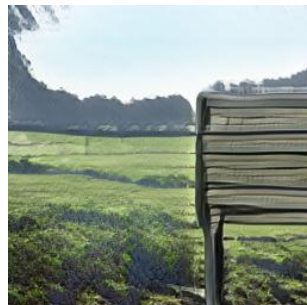

(15) A bench sitting on top of a lush green hillside.

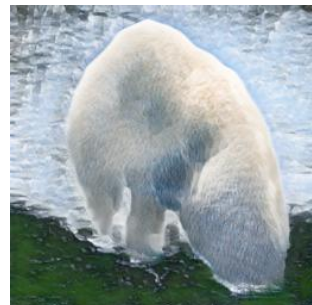

(16) A polar bear playing in the water at a wild life enclosure.



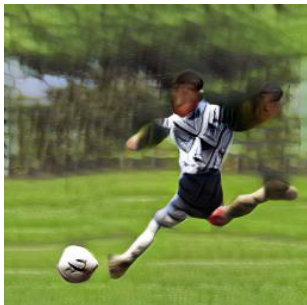

(17) A man on a soccer field next to a ball.

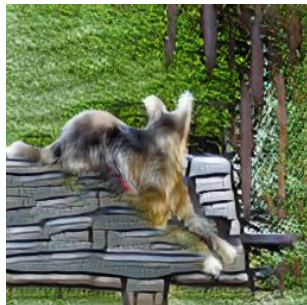

(18) A dog sitting on a bench in front of a garden.

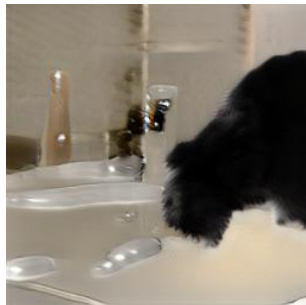

(19) A black cat drinking water out of a water faucet.

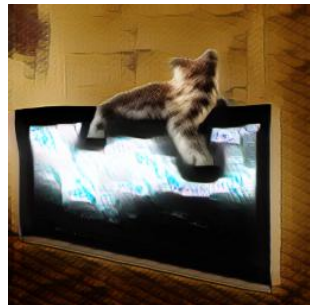

(20) A cat laying on a TV in the middle of the room.

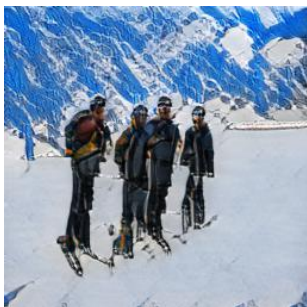

(21) Four people on skis below a mountain taking a picture.

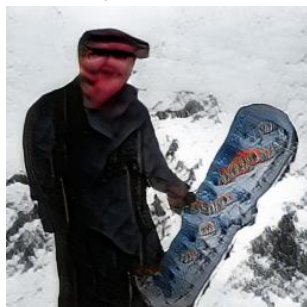

(22) A man in outdoor winter clothes holds a snowboard.

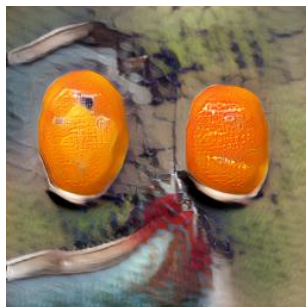

(23) A orange before and after it was cu.

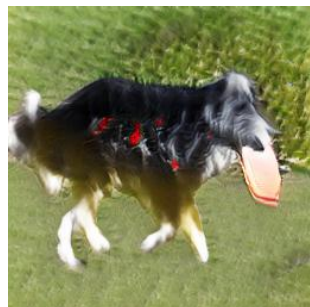

(24) A dog running with a frisbee in its mouth.

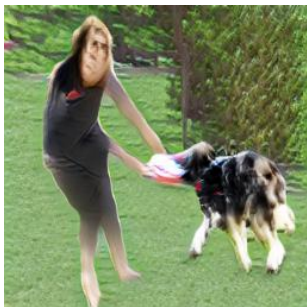

(25) A woman and a dog tussle over a frisbee.

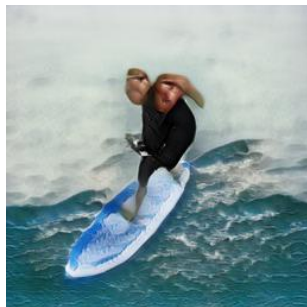

(26) Man in a wetsuit on top of a blue and white surfboard.

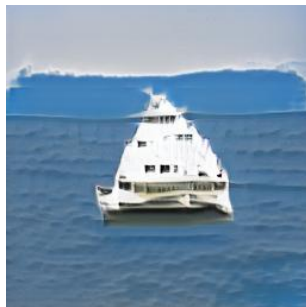

(27) A white ship sails in the blue ocean water.

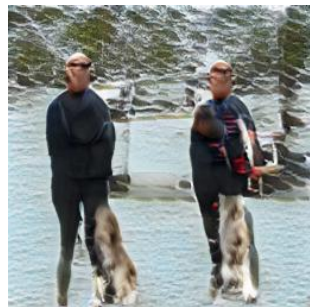

(28) A couple of men standing next to dogs near water.

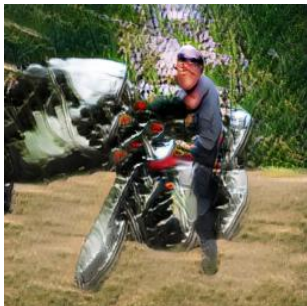

(29) A man on a motorcycle in a carport.

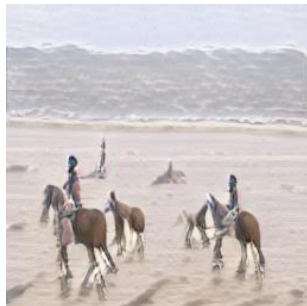

(30) A group of people riding horses on a beach.

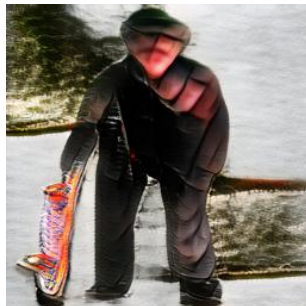

(31) A hipster wearing flood pants poses with his skateboard.

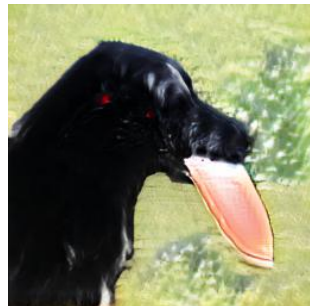

(32) A black dog holding a frisbee in its mouth.



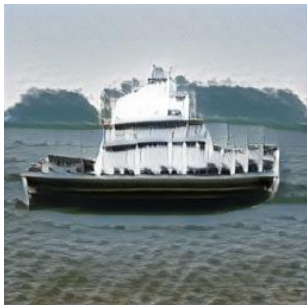

(33) A big boat on the water near the shore.

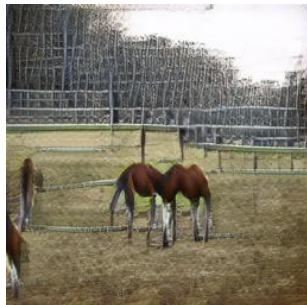

(34) All the horses in the pen are grazing.

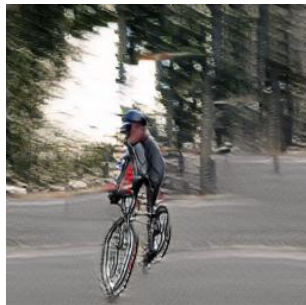

(35) A man riding a bike down the middle of a street.

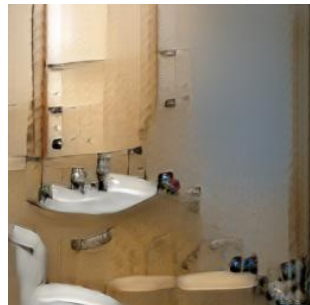

(36) A bathroom with a sink and a toilet.

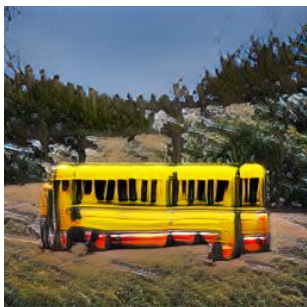

(37) A yellow school bus parked near a tree.

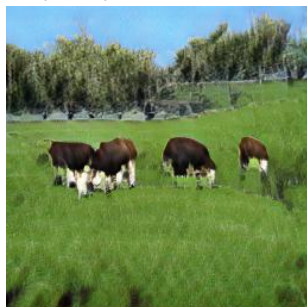

(38) A group of cows graze on some grass.

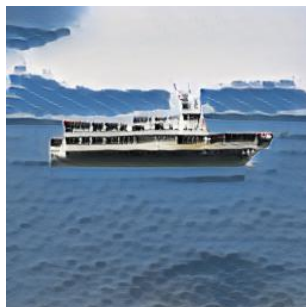

(39) A ship is sailing across an ocean filled with waves.

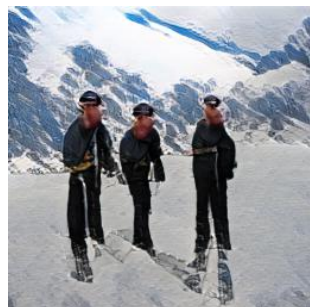

(40) Three skiers posing for a picture on the slope.

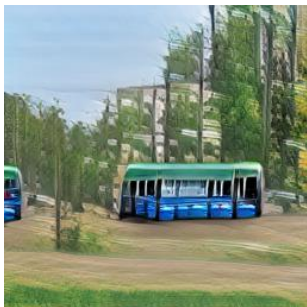

(41) A large green bus approaching a bus stop.

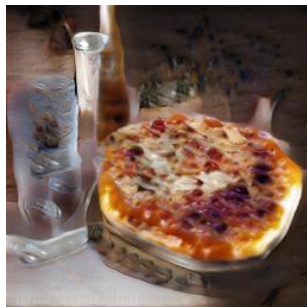

(42) A close view of a pizza, and a mug of beer.

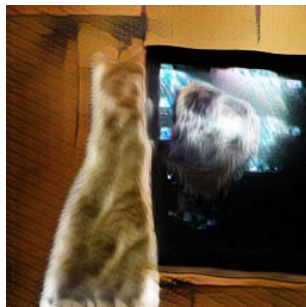

(43) A cat is looking at a television displaying a dog in a cage.

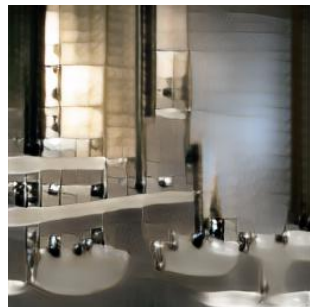

(44) Three white sinks in a bathroom under mirrors.

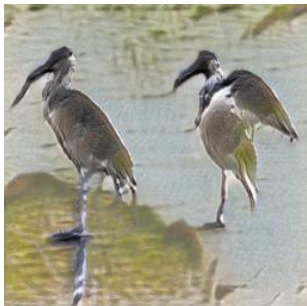

(45) Three cranes standing on one leg in the water.

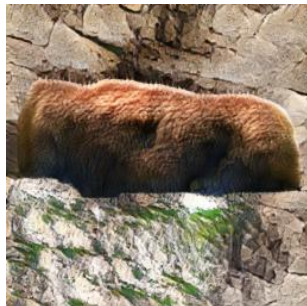

(46) A bear lying on a rock in its den, looking upward.

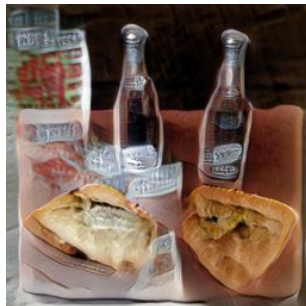

(47) Two bottles of soda sit near a sandwich.

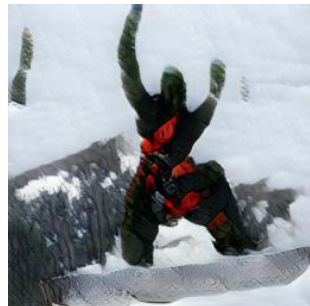

(48) Someone on a snowboard coming to a stop.

#### 4. Bi-LSTM Text Encoder, DAMSM and R-precision

We use the deep attentive multi-modal similarity model (DAMSM) proposed in [7], which learns a joint embedding of the image regions and words of a sentence in a common semantic space. The fine-grained conditional loss enforces the sub-region of the generated image to match the corresponding word in the sentence.

**Bi-LSTM text encoder** serves as the text encoder for both DAMSM and the box generator (see § 5). Bi-LSTM text encoder is a bi-directional LSTM [5] that extracts semantic vectors from the text description. In the Bi-LSTM, each word corresponds to two hidden states, one for each direction. Thus, we concatenate its two hidden states to represent the semantic meaning of a word. The feature matrix of all words is indicated by  $\dot{e} \in \mathbb{R}^{D \times T_s}$ . Its  $i^{th}$  column  $\dot{e}_i$  is the feature vector for the  $i^{th}$  word.  $D$  is the dimension of the word vector and  $T_s$  is the number of words. Meanwhile, the last hidden states of the bi-directional LSTM are concatenated to be the global sentence vector, denoted by  $\hat{e} \in \mathbb{R}^D$ . We present the network architectures for the Bi-LSTM text encoder in Table 1.

Table 1: The architecture of Bi-LSTM text encoder.

| Layer Name | Hyperparameters                                                                                                 |
|------------|-----------------------------------------------------------------------------------------------------------------|
| Embedding  | num embeddings = vocab size, embedding dim = 300                                                                |
| Dropout    | prob = 0.5                                                                                                      |
| LSTM       | input size = 300, hidden size ( $\frac{D}{2}$ ) = 128, num layers = 1, dropout prob = 0.5, bidirectional = True |

**The image encoder** is a convolutional neural network that maps images to semantic vectors. The intermediate layers of the CNN model learns local features of different regions of the image, while the later layers learn global features of the image. More specifically, the image encoder is built upon Inception-v3 model [6] pre-trained on ImageNet [4]. We first rescale the input image to be  $299 \times 299$  pixels. And then, we extract the local feature matrix  $f \in \mathbb{R}^{768 \times 289}$  (reshaped from  $768 \times 17 \times 17$ ) from “mixed\_6e” layer of Inception-v3. Each column of  $f$  is the feature vector of a local image region. 768 is the dimension of the local feature vector, and 289 is the number of regions in the image. Meanwhile, the global feature vector  $\bar{f} \in \mathbb{R}^{2048}$  is extracted from the last average pooling layer of Inception-v3. Finally, we convert the image features to the common semantic space of text features by adding a new layer perceptron as shown in Eq. (1),

$$v = Wf; \quad \bar{v} = \bar{W}\bar{f}, \quad (1)$$

where  $v \in \mathbb{R}^{D \times 289}$  and its  $i^{th}$  column  $v_i$  is the visual feature vector for the  $i^{th}$  image region;  $\bar{v} \in \mathbb{R}^D$  is the visual feature vector for the whole image. While  $v_i$  is the local image feature vector that corresponds to the word embedding,  $\bar{v}$  is the global feature vector that is related to the sentence embedding.  $D$  is the dimension of the multimodal (i.e., image and text modalities) feature space. For efficiency, all parameters in layers built from Inception-v3 model are fixed, and the parameters in newly added layers are jointly learned with the rest of networks.

**The fine-grained conditional loss** is designed to learn the correspondence between image regions and words. However, it is difficult to obtain manual annotations. Actually, many words relate to concepts that may not easily be visually defined, such as *open* or *old*. One possible solution is to learn word-image correspondence in a semi-supervised manner, in which the only supervision is the correspondence between the entire image and the whole text description (a sequence of words).

We can first calculate the similarity matrix between all possible pairs of word and image region by Eq. (2),

$$s = \dot{e}^T v, \quad (2)$$

where  $s \in \mathbb{R}^{T \times 289}$  and  $s_{i,j}$  means the similarity between the  $i^{th}$  word and the  $j^{th}$  image region.

Generally, a sub-region of the image is described by none or several words of the text description, and it is not likely to be described by the whole sentence. Therefore, we normalize the similarity matrix by Eq. (3),

$$\bar{s}_{i,j} = \frac{\exp(s_{i,j})}{\sum_{k=0}^{T-1} \exp(s_{k,j})} \quad (3)$$

Second, we build an attention model to compute a context vector for each word (query). The context vector  $c_i$  is a dynamic representation of image regions related to the  $i^{th}$  word of the text description. It is computed as the weighted sum over all visual feature vectors,

$$c_i = \sum_{j=0}^{288} \alpha_j v_j, \quad (4)$$

where we define the weight  $\alpha_j$  via Eq. (5),

$$\alpha_j = \frac{\exp(\gamma_1 \bar{s}_{i,j})}{\sum_{k=0}^{288} \exp(\gamma_1 \bar{s}_{i,k})} \quad (5)$$

Here,  $\gamma_1$  is a factor that decides how much more attention is paid to features of its relevant regions when computing the context vector for a word.

Finally, we define the relevance between the  $i^{th}$  word and the image using the cosine similarity between  $c_i$  and  $\dot{e}_i$ , i.e.,  $R(c_i, \dot{e}_i) = (c_i^T \dot{e}_i) / (\|c_i\| \|\dot{e}_i\|)$ . The relevance between the entire image (Q) and the whole text description (U) is computed by Eq. (6),

$$R(Q, U) = \log \left( \sum_{i=1}^{T-1} \exp(\gamma_2 R(c_i, \dot{e}_i)) \right)^{\frac{1}{\gamma_2}}, \quad (6)$$

where  $\gamma_2$  is a factor that determines how much to magnify the importance of the most relevant word-image pair. When  $\gamma_2 \rightarrow \infty$ ,  $R(Q, U)$  approximates to  $\max_{i=1}^{T-1} R(c_i, \dot{e}_i)$ .

For a text-image pair, we can compute the posterior probability of the text description (U) being matching with the image (Q) via,

$$P(U|Q) = \frac{\exp(\gamma_3 R(Q, U))}{\sum_{U' \in \mathbb{U}} \exp(\gamma_3 R(Q, U'))}, \quad (7)$$

where  $\gamma_3$  is a smoothing factor determined by experiments.  $\mathbb{U}$  denotes a minibatch of  $M$  text descriptions, in which only one description  $U^+$  matches the image  $Q$ . Thus, for each image, there are  $M - 1$  mismatching text descriptions. The objective function is to learn the model parameters  $\Lambda$  by minimizing the negative log posterior probability that the images are matched with their corresponding text descriptions (ground truth),

$$\mathcal{L}_1^w(\Lambda) = -\log \prod_{Q \in \mathbb{Q}} P(U^+|Q), \quad (8)$$

where ‘w’ stands for “word”.

Symmetrically, we can compute,

$$\mathcal{L}_2^w(\Lambda) = -\log \prod_{U \in \mathbb{U}} P(Q^+|U), \quad (9)$$

where  $P(Q|U) = \frac{\exp(\gamma_3 R(Q, U))}{\sum_{Q' \in \mathbb{Q}} \exp(\gamma_3 R(Q', U))}$ .

If we redefine Eq. (6) by  $R(Q, U) = (\bar{v}^T \hat{e}) / (\|\bar{v}\| \|\hat{e}\|)$  and substitute it to Eq. (7), Eq. (8), Eq. (9), we can obtain loss functions  $\mathcal{L}_1^s$  and  $\mathcal{L}_2^s$  (where ‘s’ stands for “sentence”) using the sentence embedding  $\hat{e}$  and the global visual vector  $\bar{v}$ .

The fine-grained conditional loss is defined via Eq. (10),

$$\mathcal{L}_{DAMSM} = \mathcal{L}_1^w + \mathcal{L}_2^w + \mathcal{L}_1^s + \mathcal{L}_2^s \quad (10)$$

The DAMSM is pre-trained by minimizing  $\mathcal{L}_{DAMSM}$  using real image-text pairs. Since the size of images for pre-training DAMSM is not limited by the size of images that can be generated, real images of size  $299 \times 299$  are utilized. Furthermore, the pre-trained DAMSM can provide visually-discriminative word features and a stable fine-grained conditional loss for the attention generative network.

**The R-precision score.** The DAMSM model is also used to compute the R-precision score. If there are  $R$  relevant documents for a query, we examine the top  $R$  ranked retrieval results of a system, and find that  $r$  are relevant, and then by definition, the R-precision (and also the precision and recall) is  $r/R$ . More specifically, we use generated images to query their corresponding text descriptions. First, the image encoder and Bi-LSTM text encoder learned in our pre-trained DAMSM are utilized to extract features of the generated images and the given text descriptions. Then, we compute cosine similarities between the image features and the text features. Finally, we rank candidates text descriptions for each image in descending similarity and find the top  $r$  relevant descriptions for computing the R-precision.



## 5. Network Architectures for Semantic Layout Generation

**Box generator.** We design our box generator by improving the one in [1] to be attentive. We denote the bounding box of the  $t$ -th object as  $B_t = (b_t^x, b_t^y, b_t^w, b_t^h, \mathbf{l}_t)$ . Then, we formulate the joint probability of sampling  $B_t$  from the box generator as

$$p(b_t^x, b_t^y, b_t^w, b_t^h, \mathbf{l}_t) = p(\mathbf{l}_t)p(b_t^x, b_t^y, b_t^w, b_t^h | \mathbf{l}_t). \quad (11)$$

We implement  $p(\mathbf{l}_t)$  as a categorical distribution, and implement  $p(b_t^x, b_t^y, b_t^w, b_t^h | \mathbf{l}_t)$  as a mixture of quadrivariate Gaussians. As described in [1], in order to reduce the parameter space, we decompose the box coordinate probability as  $p(b_t^x, b_t^y, b_t^w, b_t^h | \mathbf{l}_t) = p(b_t^x, b_t^y | \mathbf{l}_t)p(b_t^w, b_t^h | b_t^x, b_t^y, \mathbf{l}_t)$ , and approximate it with two bivariate Gaussian mixtures by

$$p(b_t^x, b_t^y | \mathbf{l}_t) = \sum_{k=1}^K \pi_{t,k}^{xy} \mathcal{N}(b_t^x, b_t^y; \boldsymbol{\mu}_{t,k}^{xy}, \Sigma_{t,k}^{xy}), \quad (12)$$

$$p(b_t^w, b_t^h | b_t^x, b_t^y, \mathbf{l}_t) = \sum_{k=1}^K \pi_{t,k}^{wh} \mathcal{N}(b_t^w, b_t^h; \boldsymbol{\mu}_{t,k}^{wh}, \Sigma_{t,k}^{wh}). \quad (13)$$

In practice, as in [1], we implement the box generator within a encoder-decoder framework. The encoder is the Bi-LSTM text encoder as mentioned in § 4. The Gaussian Mixture Model (GMM) parameters for Eq. (11) are obtained from the decoder LSTM outputs. Given text encoder’s final hidden state  $h_{T_s}^{\text{Enc}} \in \mathbb{R}^D$  and output  $H^{\text{Enc}} \in \mathbb{R}^{T_s \times D}$ , we initialize the decoder’s initial hidden state  $h_0$  with  $h_{T_s}^{\text{Enc}}$ . As for  $H^{\text{Enc}}$ , we use it to compute the contextual input  $z_t$  for the decoder:

$$z_t = \sum_{i=1}^{T_s} \alpha_i h_i^{\text{Enc}}, \text{ with } \alpha_i = W_v \cdot (W_\alpha [h_{t-1}, h_i^{\text{Enc}}]), \quad (14)$$

where  $W_v$  is a learnable parameter,  $W_\alpha$  is the parameter of a linear transformation, and  $\cdot$  and  $[\cdot, \cdot]$  represent the dot product and concatenation operation, respectively.

Then, the calculation of GMM parameters are shown as follows:

$$[h_t, c_t] = \text{LSTM}([B_{t-1}, z_t]; [h_{t-1}, c_{t-1}]), \quad (15)$$

$$\mathbf{l}_t = W^l h_t + \mathbf{b}^l, \quad (16)$$

$$\boldsymbol{\theta}_t^{xy} = W^{xy} [h_t, \mathbf{l}_t] + \mathbf{b}^{xy}, \quad (17)$$

$$\boldsymbol{\theta}_t^{wh} = W^{wh} [h_t, \mathbf{l}_t, b_x, b_y] + \mathbf{b}^{wh}, \quad (18)$$

where  $\boldsymbol{\theta}_t = [\boldsymbol{\pi}_{t,1:K}, \boldsymbol{\mu}_{t,1:K}, \boldsymbol{\Sigma}_{t,1:K}]$  are the parameters for GMM concatenated to a vector. We use the same Adam optimizer and training hyperparameters (*i.e.*, learning rate 0.001,  $\beta_1 = 0.9$ ,  $\beta_2 = 0.999$ ) as in [1].

**Shape generator.** We implement the shape generator in [1] with almost the same architecture except the upsample block. In [1], the upsample block is designed as [convtranspose  $4 \times 4$  (pad 1, stride 2) - Instance Normalization - ReLU]. We discovered that the usage of convtranspose would lead to unstable training which is reflected by the frequent severe grid artifacts. To this end, we replace this upsample block with that in our image generator (see Table 2) by switching the batch normalization to the instance one.

## 6. Network Architectures for Image Generation

We present the network architecture for image generators in Table 3 and the network architectures for discriminators in Table 4, Table 5 and Table 6. They are built with basic blocks defined in Table 2. We set the hyperparameters of the network structures as:  $N_g = 48$ ,  $N_d = 96$ ,  $N_c = 80$ ,  $N_e = 256$ ,  $N_l = 50$ ,  $m_0 = 7$ ,  $m_1 = 3$ , and  $m_2 = 3$ .

We employ an Adam optimizer for the generators with learning rate 0.0002,  $\beta_1 = 0.5$  and  $\beta_2 = 0.999$ . For each discriminator, we also employ an Adam optimizer with the same hyperparameters.

We design the object-wise discriminators for small objects and large objects, respectively. We specify that if the maximum of width or height of an object is greater than one-third of the image size, then this object is large; otherwise, it is small.

Table 2: The basic blocks for architecture design. (“-” connects two consecutive layers; “+” means element-wise addition between two layers.)

| Name                        | Operations / Layers                                                                                                                                                                                     |
|-----------------------------|---------------------------------------------------------------------------------------------------------------------------------------------------------------------------------------------------------|
| Interpolating ( $k$ )       | Nearest neighbor upsampling layer (up-scaling the spatial size by $k$ )                                                                                                                                 |
| Upsampling ( $k$ )          | Interpolating (2) - convolution $3 \times 3$ (stride 1, padding 1, decreasing #channels to $k$ ) - Batch Normalization (BN) - Gated Linear Unit (GLU).                                                  |
| Downsampling ( $k$ )        | In $G$ s: convolution $3 \times 3$ (stride 2, increasing #channels to $k$ ) - BN - LeakyReLU.<br>In $D$ s, the convolutional kernel size is 4. In the first block of $D$ s, BN is not applied.          |
| Downsampling w/ SN ( $k$ )  | Convolution $4 \times 4$ (spectral normalized, stride 2, increasing #channels to $k$ ) - BN - LeakyReLU.<br>In the first block of $D$ s, BN is not applied.                                             |
| Concat                      | Concatenate input tensors along the channel dimension.                                                                                                                                                  |
| Residual                    | Input + [Reflection Pad (RPad) 1 - convolution $3 \times 3$ (stride 1, doubling #channels) - Instance Normalization (IN) - GLU - RPad 1 - convolution $3 \times 3$ (stride 1, keeping #channels) - IN]. |
| FC                          | At the beginning of $G$ s: fully connected layer - BN - GLU - reshape to 3D tensor.                                                                                                                     |
| FC w/ SN ( $k$ )            | Fully connected layer (spectral normalized, changing #channels to $k$ ).                                                                                                                                |
| Outlogits                   | Convolution $4 \times 4$ (stride 2, decreasing #channels to 1) - sigmoid.                                                                                                                               |
| Repeat ( $k \times k$ )     | Copy a vector $k \times k$ times.                                                                                                                                                                       |
| Fmap Sum                    | Summing the two input feature maps element-wisely.                                                                                                                                                      |
| Fmap Mul                    | Multiplying the two input feature maps element-wisely.                                                                                                                                                  |
| Avg Pool ( $k$ )            | Average pooling along the $k$ -th dimension.                                                                                                                                                            |
| Conv $3 \times 3$ ( $k$ )   | In $G$ s: convolution $3 \times 3$ (stride 1, padding 1, changing #channels to $k$ ) - Tanh.<br>In $D$ s, convolution $3 \times 3$ (stride 1, padding 1, changing #channels to $k$ ) - BN - LeakyReLU.  |
| Conv $4 \times 4$ w/ SN     | Convolution $4 \times 4$ (spectral normalized, stride 2, keeping #channels).                                                                                                                            |
| Conv $1 \times 1$ w/ SN     | Convolution $1 \times 1$ (spectral normalized, stride 1, decreasing #channels to 1).                                                                                                                    |
| $F^{\text{ca}}$             | Conditioning augmentation that converts the sentence embedding $\hat{e}$ to the conditioning vector $\bar{e}$ : fully connected layer - ReLU.                                                           |
| $F^{\text{pat-attn}}$       | Grid attention module. Refer to the paper for more details.                                                                                                                                             |
| $F^{\text{obj-attn}}$       | Object-driven attention module. Refer to the paper for more details.                                                                                                                                    |
| $F^{\text{lab-distr}}$      | Label distribution module. Refer to the paper for more details.                                                                                                                                         |
| Shape Encoder ( $k$ )       | RPad 1 - convolution $3 \times 3$ (stride 1, decreasing #channels to $k$ ) - IN - LeakyReLU.                                                                                                            |
| Shape Encoder w/ SN ( $k$ ) | RPad 1 - convolution $3 \times 3$ (spectral normalized, stride 1, decreasing #channels to $k$ ) - IN - LeakyReLU.                                                                                       |
| ROI Encoder                 | Convolution $4 \times 4$ (stride 1, padding 1, decreasing #channels to $N_d * 4$ ) - LeakyReLU.                                                                                                         |
| ROI Encoder w/ SN           | Convolution $4 \times 4$ (spectral normalized, stride 1, padding 1, decreasing #channels to $N_d * 4$ ) - LeakyReLU.                                                                                    |
| ROI Align ( $k$ )           | Pooling $k \times k$ feature maps for ROI.                                                                                                                                                              |

Table 3: The structure for generators of Obj-GAN.

| Stage | Name                               | Input Tensors                                                         | Output Tensors                         |
|-------|------------------------------------|-----------------------------------------------------------------------|----------------------------------------|
| $G_0$ | FC                                 | 100-dimensional $z$ , and $F^{\text{ca}}$                             | $8 \times 8 \times 4N_g$               |
|       | Upsampling ( $2N_g$ )              | $8 \times 8 \times 4N_g$                                              | $16 \times 16 \times 2N_g$             |
|       | Upsampling ( $N_g$ )               | $16 \times 16 \times 2N_g$                                            | $c (32 \times 32 \times N_g)$          |
|       | Shape Encoder ( $\frac{1}{2}N_g$ ) | $M^0 (64 \times 64 \times N_c)$                                       | $64 \times 64 \times \frac{1}{2}N_g$   |
|       | Downsampling ( $N_g$ )             | $64 \times 64 \times \frac{1}{2}N_g$                                  | $u_0 (32 \times 32 \times N_g)$        |
|       | Concat                             | $c, u_0, F^{\text{obj-attn}}, F^{\text{lab-distr}}$                   | $32 \times 32 \times (3N_g + N_l)$     |
|       | $m_0$ Residual                     | $32 \times 32 \times (3N_g + N_l)$                                    | $32 \times 32 \times (3N_g + N_l)$     |
|       | Upsampling ( $N_g$ )               | $32 \times 32 \times (3N_g + N_l)$                                    | $h_0 (64 \times 64 \times N_g)$        |
| $G_1$ | Conv $3 \times 3$ (3)              | $h_0$                                                                 | $x_0 (64 \times 64 \times 3)$          |
|       | Shape Encoder ( $\frac{1}{2}N_g$ ) | $M^1 (128 \times 128 \times N_c)$                                     | $128 \times 128 \times \frac{1}{2}N_g$ |
|       | Downsampling ( $N_g$ )             | $128 \times 128 \times \frac{1}{2}N_g$                                | $u_1 (64 \times 64 \times N_g)$        |
|       | Fmap Sum                           | $h_0, u_1$                                                            | $h_0 (64 \times 64 \times N_g)$        |
|       | Concat                             | $F^{\text{pat-attn}}, h_0, F^{\text{obj-attn}}, F^{\text{lab-distr}}$ | $64 \times 64 \times (3N_g + N_l)$     |
|       | $m_1$ Residual                     | $64 \times 64 \times (3N_g + N_l)$                                    | $64 \times 64 \times (3N_g + N_l)$     |
|       | Upsampling ( $N_g$ )               | $64 \times 64 \times (3N_g + N_l)$                                    | $h_1 (128 \times 128 \times N_g)$      |
| $G_2$ | Conv $3 \times 3$ (3)              | $h_1$                                                                 | $x_1 (128 \times 128 \times 3)$        |
|       | Shape Encoder ( $\frac{1}{2}N_g$ ) | $M^2 (256 \times 256 \times N_c)$                                     | $256 \times 256 \times \frac{1}{2}N_g$ |
|       | Downsampling ( $N_g$ )             | $256 \times 256 \times \frac{1}{2}N_g$                                | $u_2 (128 \times 128 \times N_g)$      |
|       | Fmap Sum                           | $h_1, u_2$                                                            | $h_1 (128 \times 128 \times N_g)$      |
|       | Concat                             | $F^{\text{pat-attn}}, h_1, F^{\text{obj-attn}}, F^{\text{lab-distr}}$ | $128 \times 128 \times (3N_g + N_l)$   |
|       | $m_2$ Residual                     | $128 \times 128 \times (3N_g + N_l)$                                  | $128 \times 128 \times (3N_g + N_l)$   |
|       | Upsampling ( $N_g$ )               | $128 \times 128 \times (3N_g + N_l)$                                  | $h_2 (256 \times 256 \times N_g)$      |
| $G_3$ | Conv $3 \times 3$ (3)              | $h_2$                                                                 | $x_2 (256 \times 256 \times 3)$        |



Table 4: The structure for patch-wise discriminators of Obj-GAN.  $\bar{e}$  is output by  $F^{\text{ca}}$ 

| Stage | Name                                  | Input Tensors                       | Output Tensors                        |
|-------|---------------------------------------|-------------------------------------|---------------------------------------|
| $D_0$ | Downsampling ( $N_d$ )                | $x_0$ ( $64 \times 64 \times 3$ )   | $32 \times 32 \times N_d$             |
|       | Downsampling ( $2N_d$ )               | $32 \times 32 \times N_d$           | $16 \times 16 \times 2N_d$            |
|       | Downsampling ( $4N_d$ )               | $16 \times 16 \times 2N_d$          | $8 \times 8 \times 4N_d$              |
|       | Downsampling ( $8N_d$ )               | $8 \times 8 \times 4N_d$            | $h_0$ ( $4 \times 4 \times 8N_d$ )    |
|       | Repeat ( $4 \times 4$ )               | $\bar{e}$ ( $N_e$ )                 | $4 \times 4 \times N_e$               |
|       | Concat - Conv $3 \times 3$ ( $8N_d$ ) | $h_0, 4 \times 4 \times N_e$        | $he_0$ ( $4 \times 4 \times 8N_d$ )   |
|       | Outlogits (unconditional loss)        | $h_0$                               | 1                                     |
|       | Outlogits (conditional loss)          | $he_0$                              | 1                                     |
| $D_1$ | Downsampling ( $N_d$ )                | $x_1$ ( $128 \times 128 \times 3$ ) | $64 \times 64 \times N_d$             |
|       | Downsampling ( $2N_d$ )               | $64 \times 64 \times N_d$           | $32 \times 32 \times 2N_d$            |
|       | Downsampling ( $4N_d$ )               | $32 \times 32 \times 2N_d$          | $16 \times 16 \times 4N_d$            |
|       | Downsampling ( $8N_d$ )               | $16 \times 16 \times 4N_d$          | $h_1$ ( $8 \times 8 \times 8N_d$ )    |
|       | Repeat ( $8 \times 8$ )               | $\bar{e}$ ( $N_e$ )                 | $8 \times 8 \times N_e$               |
|       | Concat - Conv $3 \times 3$ ( $8N_d$ ) | $h_1, 8 \times 8 \times N_e$        | $he_1$ ( $8 \times 8 \times 8N_d$ )   |
|       | Outlogits (unconditional loss)        | $h_1$                               | $3 \times 3$                          |
|       | Outlogits (conditional loss)          | $he_1$                              | $3 \times 3$                          |
| $D_2$ | Downsampling ( $N_d$ )                | $x_2$ ( $256 \times 256 \times 3$ ) | $128 \times 128 \times N_d$           |
|       | Downsampling ( $2N_d$ )               | $128 \times 128 \times N_d$         | $64 \times 64 \times 2N_d$            |
|       | Downsampling ( $4N_d$ )               | $64 \times 64 \times 2N_d$          | $32 \times 32 \times 4N_d$            |
|       | Downsampling ( $8N_d$ )               | $32 \times 32 \times 4N_d$          | $h_2$ ( $16 \times 16 \times 8N_d$ )  |
|       | Repeat ( $16 \times 16$ )             | $\bar{e}$ ( $N_e$ )                 | $16 \times 16 \times N_e$             |
|       | Concat - Conv $3 \times 3$ ( $8N_d$ ) | $h_2, 16 \times 16 \times N_e$      | $he_2$ ( $16 \times 16 \times 8N_d$ ) |
|       | Outlogits (unconditional loss)        | $h_2$                               | $7 \times 7$                          |
|       | Outlogits (conditional loss)          | $he_2$                              | $7 \times 7$                          |

Table 5: The structure for shape discriminators of Obj-GAN.

| Stage | Name                               | Input Tensors                                                               | Output Tensors                               |
|-------|------------------------------------|-----------------------------------------------------------------------------|----------------------------------------------|
| $D_0$ | Shape Encoder ( $\frac{1}{8}N_d$ ) | $M^0$ ( $64 \times 64 \times N_c$ )                                         | $64 \times 64 \times \frac{1}{8}N_d$         |
|       | Concat                             | $x_0$ ( $64 \times 64 \times 3$ ), $64 \times 64 \times \frac{1}{8}N_d$     | $64 \times 64 \times (3 + \frac{1}{8}N_d)$   |
|       | Downsampling ( $N_d$ )             | $64 \times 64 \times (3 + \frac{1}{8}N_d)$                                  | $32 \times 32 \times N_d$                    |
|       | Downsampling ( $2N_d$ )            | $32 \times 32 \times N_d$                                                   | $16 \times 16 \times 2N_d$                   |
|       | Downsampling ( $4N_d$ )            | $16 \times 16 \times 2N_d$                                                  | $8 \times 8 \times 4N_d$                     |
|       | Downsampling ( $8N_d$ )            | $8 \times 8 \times 4N_d$                                                    | $h_0$ ( $4 \times 4 \times 8N_d$ )           |
|       | Outlogits (unconditional loss)     | $h_0$                                                                       | 1                                            |
| $D_1$ | Shape Encoder ( $\frac{1}{8}N_d$ ) | $M^1$ ( $128 \times 128 \times N_c$ )                                       | $128 \times 128 \times \frac{1}{8}N_d$       |
|       | Concat                             | $x_1$ ( $128 \times 128 \times 3$ ), $128 \times 128 \times \frac{1}{8}N_d$ | $128 \times 128 \times (3 + \frac{1}{8}N_d)$ |
|       | Downsampling ( $N_d$ )             | $128 \times 128 \times (3 + \frac{1}{8}N_d)$                                | $64 \times 64 \times N_d$                    |
|       | Downsampling ( $2N_d$ )            | $64 \times 64 \times N_d$                                                   | $32 \times 32 \times 2N_d$                   |
|       | Downsampling ( $4N_d$ )            | $32 \times 32 \times 2N_d$                                                  | $16 \times 16 \times 4N_d$                   |
|       | Downsampling ( $8N_d$ )            | $16 \times 16 \times 4N_d$                                                  | $h_1$ ( $8 \times 8 \times 8N_d$ )           |
|       | Outlogits (unconditional loss)     | $h_1$                                                                       | $3 \times 3$                                 |
| $D_2$ | Shape Encoder ( $\frac{1}{8}N_d$ ) | $M^2$ ( $256 \times 256 \times N_c$ )                                       | $256 \times 256 \times \frac{1}{8}N_d$       |
|       | Concat                             | $x_2$ ( $256 \times 256 \times 3$ ), $256 \times 256 \times \frac{1}{8}N_d$ | $256 \times 256 \times (3 + \frac{1}{8}N_d)$ |
|       | Downsampling ( $N_d$ )             | $256 \times 256 \times (3 + \frac{1}{8}N_d)$                                | $128 \times 128 \times N_d$                  |
|       | Downsampling ( $2N_d$ )            | $128 \times 128 \times N_d$                                                 | $64 \times 64 \times 2N_d$                   |
|       | Downsampling ( $4N_d$ )            | $64 \times 64 \times 2N_d$                                                  | $32 \times 32 \times 4N_d$                   |
|       | Downsampling ( $8N_d$ )            | $32 \times 32 \times 4N_d$                                                  | $h_2$ ( $16 \times 16 \times 8N_d$ )         |
|       | Outlogits (unconditional loss)     | $h_2$                                                                       | $7 \times 7$                                 |

Table 6: The structure for object-wise discriminators of Obj-GAN.  $c^{\text{obj}}$  represents the intermediate context vectors of  $F^{\text{obj-attn}}$ , and  $e^g$  represents the embedding vectors the class labels.

| Stage | Name                                  | Input Tensors                                                                                     | Output Tensors                                        |
|-------|---------------------------------------|---------------------------------------------------------------------------------------------------|-------------------------------------------------------|
| small | Interpolating (2)                     | $M^2 (256 \times 256 \times N_c)$                                                                 | $512 \times 512 \times N_c$                           |
|       | Interpolating (2)                     | $x^2 (256 \times 256 \times 3)$                                                                   | $512 \times 512 \times 3$                             |
|       | Shape Encoder ( $\frac{1}{8}N_d$ )    | $512 \times 512 \times N_c$                                                                       | $512 \times 512 \times \frac{1}{8}N_d$                |
|       | Concat                                | $512 \times 512 \times 3, 512 \times 512 \times \frac{1}{8}N_d$                                   | $512 \times 512 \times (3 + \frac{1}{8}N_d)$          |
|       | Downsampling ( $N_d$ )                | $512 \times 512 \times (3 + \frac{1}{8}N_d)$                                                      | $256 \times 256 \times N_d$                           |
|       | Downsampling ( $2N_d$ )               | $256 \times 256 \times N_d$                                                                       | $128 \times 128 \times 2N_d$                          |
|       | Downsampling ( $4N_d$ )               | $128 \times 128 \times 2N_d$                                                                      | $64 \times 64 \times 4N_d$                            |
|       | ROI Align (5)                         | $64 \times 64 \times 4N_d$                                                                        | $N_{\text{small}} \times 5 \times 5 \times 4N_d$      |
|       | ROI Encoder (5)                       | $N_{\text{small}} \times 5 \times 5 \times 4N_d$                                                  | $h (N_{\text{small}} \times 4 \times 4 \times 4N_d)$  |
|       | Repeat ( $4 \times 4$ )               | $c^{\text{obj}} (N_{\text{small}} \times N_g)$                                                    | $N_{\text{small}} \times 4 \times 4 \times N_g$       |
|       | Repeat ( $4 \times 4$ )               | $e^g (N_{\text{small}} \times N_l)$                                                               | $N_{\text{small}} \times 4 \times 4 \times N_l$       |
|       | Concat - Conv $3 \times 3$ ( $4N_d$ ) | $h, N_{\text{small}} \times 4 \times 4 \times N_g, N_{\text{small}} \times 4 \times 4 \times N_l$ | $hc (N_{\text{small}} \times 4 \times 4 \times 4N_d)$ |
|       | Outlogits (unconditional loss)        | $h$                                                                                               | $N_{\text{small}}$                                    |
|       | Outlogits (conditional loss)          | $hc$                                                                                              | $N_{\text{small}}$                                    |
| large | Interpolating (2)                     | $M^2 (256 \times 256 \times N_c)$                                                                 | $512 \times 512 \times N_c$                           |
|       | Interpolating (2)                     | $x^2 (256 \times 256 \times 3)$                                                                   | $512 \times 512 \times 3$                             |
|       | Shape Encoder ( $\frac{1}{8}N_d$ )    | $512 \times 512 \times N_c$                                                                       | $512 \times 512 \times \frac{1}{8}N_d$                |
|       | Concat                                | $512 \times 512 \times 3, 512 \times 512 \times \frac{1}{8}N_d$                                   | $512 \times 512 \times (3 + \frac{1}{8}N_d)$          |
|       | Downsampling ( $N_d$ )                | $512 \times 512 \times (3 + \frac{1}{8}N_d)$                                                      | $256 \times 256 \times N_d$                           |
|       | Downsampling ( $2N_d$ )               | $256 \times 256 \times N_d$                                                                       | $128 \times 128 \times 2N_d$                          |
|       | Downsampling ( $4N_d$ )               | $128 \times 128 \times 2N_d$                                                                      | $64 \times 64 \times 4N_d$                            |
|       | Downsampling ( $8N_d$ )               | $64 \times 64 \times 4N_d$                                                                        | $32 \times 32 \times 8N_d$                            |
|       | ROI Align (5)                         | $32 \times 32 \times 8N_d$                                                                        | $N_{\text{large}} \times 5 \times 5 \times 8N_d$      |
|       | ROI Encoder (5)                       | $N_{\text{large}} \times 5 \times 5 \times 8N_d$                                                  | $h (N_{\text{large}} \times 4 \times 4 \times 4N_d)$  |
|       | Repeat ( $4 \times 4$ )               | $c^{\text{obj}} (N_{\text{large}} \times N_g)$                                                    | $N_{\text{large}} \times 4 \times 4 \times N_g$       |
|       | Repeat ( $4 \times 4$ )               | $e^g (N_{\text{large}} \times N_l)$                                                               | $N_{\text{large}} \times 4 \times 4 \times N_l$       |
|       | Concat - Conv $3 \times 3$ ( $4N_d$ ) | $h, N_{\text{large}} \times 4 \times 4 \times N_g, N_{\text{large}} \times 4 \times 4 \times N_l$ | $hc (N_{\text{large}} \times 4 \times 4 \times 4N_d)$ |
|       | Outlogits (unconditional loss)        | $h$                                                                                               | $N_{\text{large}}$                                    |
|       | Outlogits (conditional loss)          | $hc$                                                                                              | $N_{\text{large}}$                                    |

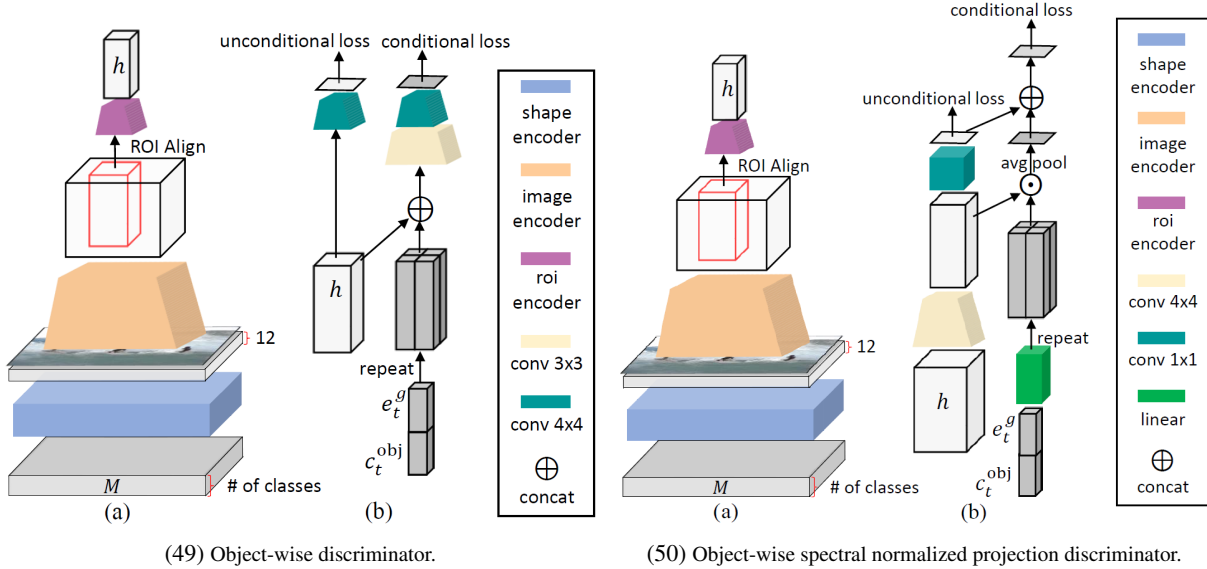

Figure 1: The comparison between the object-wise discriminator and its spectral normalized projection version. (a) extracts the region feature based on the Fast R-CNN model. (b) determines whether the  $t$ -th object is realistic (consistent with its label  $e_t^g$  and text context information  $c_t^{\text{obj}}$ ) or not.

## 7. Network Architectures for Spectral Normalized Projection Discriminators

We combine our discriminators above with the spectral normalized projection discriminator in [2, 3]. The difference between the object-wise discriminator and the object-wise spectral normalized projection discriminator is illustrated in Figure 1. We present detailed network architectures of the spectral normalized projection discriminators in Table 7, Table 8 and



Table 9, with basic blocks defined in Table 2.

Table 7: The structure for patch-wise spectral normalized projection discriminators of Obj-GAN.  $\bar{e}$  is output by  $F^{\text{ca}}$ 

| Stage | Name                                         | Input Tensors                       | Output Tensors                         |
|-------|----------------------------------------------|-------------------------------------|----------------------------------------|
| $D_0$ | Downsampling w/ SN ( $N_d$ )                 | $x_0$ ( $64 \times 64 \times 3$ )   | $32 \times 32 \times N_d$              |
|       | Downsampling w/ SN ( $2N_d$ )                | $32 \times 32 \times N_d$           | $16 \times 16 \times 2N_d$             |
|       | Downsampling w/ SN ( $4N_d$ )                | $16 \times 16 \times 2N_d$          | $8 \times 8 \times 4N_d$               |
|       | Downsampling w/ SN ( $8N_d$ )                | $8 \times 8 \times 4N_d$            | $4 \times 4 \times 8N_d$               |
|       | Conv $4 \times 4$ w/ SN                      | $4 \times 4 \times 8N_d$            | $h_0$ ( $8N_d$ )                       |
|       | FC w/ SN ( $8N_d$ )                          | $\bar{e}$ ( $N_e$ )                 | $c_0$ ( $8N_d$ )                       |
|       | Fmap Mul - Avg Pool (0)                      | $h_0, c_0$                          | $hc_0$ (1)                             |
|       | Conv $1 \times 1$ w/ SN (unconditional loss) | $h_0$                               | $o_0^{\text{uncond}}$ (1)              |
|       | Fmap Sum (conditional loss)                  | $o_0^{\text{uncond}}, hc_0$         | $o_0^{\text{cond}}$ (1)                |
| $D_1$ | Downsampling w/ SN ( $N_d$ )                 | $x_1$ ( $128 \times 128 \times 3$ ) | $64 \times 64 \times N_d$              |
|       | Downsampling w/ SN ( $2N_d$ )                | $64 \times 64 \times N_d$           | $32 \times 32 \times 2N_d$             |
|       | Downsampling w/ SN ( $4N_d$ )                | $32 \times 32 \times 2N_d$          | $16 \times 16 \times 4N_d$             |
|       | Downsampling w/ SN ( $8N_d$ )                | $16 \times 16 \times 4N_d$          | $8 \times 8 \times 8N_d$               |
|       | Conv $4 \times 4$ w/ SN                      | $8 \times 8 \times 8N_d$            | $h_1$ ( $3 \times 3 \times 8N_d$ )     |
|       | FC w/ SN ( $8N_d$ )                          | $\bar{e}$ ( $N_e$ )                 | $8N_d$                                 |
|       | Repeat ( $3 \times 3$ )                      | $8N_d$                              | $c_1$ ( $3 \times 3 \times 8N_d$ )     |
|       | Fmap Mul - Avg Pool (2)                      | $h_1, c_1$                          | $hc_1$ ( $3 \times 3$ )                |
|       | Conv $1 \times 1$ w/ SN (unconditional loss) | $h_1$                               | $o_1^{\text{uncond}}$ ( $3 \times 3$ ) |
| $D_2$ | Downsampling w/ SN ( $N_d$ )                 | $x_2$ ( $256 \times 256 \times 3$ ) | $128 \times 128 \times N_d$            |
|       | Downsampling w/ SN ( $2N_d$ )                | $128 \times 128 \times N_d$         | $64 \times 64 \times 2N_d$             |
|       | Downsampling w/ SN ( $4N_d$ )                | $64 \times 64 \times 2N_d$          | $32 \times 32 \times 4N_d$             |
|       | Downsampling w/ SN ( $8N_d$ )                | $32 \times 32 \times 4N_d$          | $16 \times 16 \times 8N_d$             |
|       | Conv $4 \times 4$ w/ SN                      | $16 \times 16 \times 8N_d$          | $h_2$ ( $7 \times 7 \times 8N_d$ )     |
|       | FC w/ SN ( $8N_d$ )                          | $\bar{e}$ ( $N_e$ )                 | $8N_d$                                 |
|       | Repeat ( $7 \times 7$ )                      | $8N_d$                              | $c_2$ ( $7 \times 7 \times 8N_d$ )     |
|       | Fmap Mul - Avg Pool (2)                      | $h_2, c_2$                          | $hc_2$ ( $7 \times 7$ )                |
|       | Conv $1 \times 1$ w/ SN (unconditional loss) | $h_2$                               | $o_2^{\text{uncond}}$ ( $7 \times 7$ ) |
|       | Fmap Sum (conditional loss)                  | $o_2^{\text{uncond}}, hc_2$         | $o_2^{\text{cond}}$ ( $7 \times 7$ )   |

Table 8: The structure for shape spectral normalized projection discriminators of Obj-GAN.

| Stage | Name                                         | Input Tensors                                                               | Output Tensors                               |
|-------|----------------------------------------------|-----------------------------------------------------------------------------|----------------------------------------------|
| $D_0$ | Shape Encoder w/ SN ( $\frac{1}{8}N_d$ )     | $M^0$ ( $64 \times 64 \times N_c$ )                                         | $64 \times 64 \times \frac{1}{8}N_d$         |
|       | Concat                                       | $x_0$ ( $64 \times 64 \times 3$ ), $64 \times 64 \times \frac{1}{8}N_d$     | $64 \times 64 \times (3 + \frac{1}{8}N_d)$   |
|       | Downsampling w/ SN ( $N_d$ )                 | $64 \times 64 \times (3 + \frac{1}{8}N_d)$                                  | $32 \times 32 \times N_d$                    |
|       | Downsampling w/ SN ( $2N_d$ )                | $32 \times 32 \times N_d$                                                   | $16 \times 16 \times 2N_d$                   |
|       | Downsampling w/ SN ( $4N_d$ )                | $16 \times 16 \times 2N_d$                                                  | $8 \times 8 \times 4N_d$                     |
|       | Downsampling w/ SN ( $8N_d$ )                | $8 \times 8 \times 4N_d$                                                    | $4 \times 4 \times 8N_d$                     |
|       | Conv $4 \times 4$ w/ SN                      | $4 \times 4 \times 8N_d$                                                    | $h_0$ ( $8N_d$ )                             |
|       | Conv $1 \times 1$ w/ SN (unconditional loss) | $h_0$                                                                       | 1                                            |
| $D_1$ | Shape Encoder w/ SN ( $\frac{1}{8}N_d$ )     | $M^1$ ( $128 \times 128 \times N_c$ )                                       | $128 \times 128 \times \frac{1}{8}N_d$       |
|       | Concat                                       | $x_1$ ( $128 \times 128 \times 3$ ), $128 \times 128 \times \frac{1}{8}N_d$ | $128 \times 128 \times (3 + \frac{1}{8}N_d)$ |
|       | Downsampling w/ SN ( $N_d$ )                 | $128 \times 128 \times (3 + \frac{1}{8}N_d)$                                | $64 \times 64 \times N_d$                    |
|       | Downsampling w/ SN ( $2N_d$ )                | $64 \times 64 \times N_d$                                                   | $32 \times 32 \times 2N_d$                   |
|       | Downsampling w/ SN ( $4N_d$ )                | $32 \times 32 \times 2N_d$                                                  | $16 \times 16 \times 4N_d$                   |
|       | Downsampling w/ SN ( $8N_d$ )                | $16 \times 16 \times 4N_d$                                                  | $8 \times 8 \times 8N_d$                     |
|       | Conv $4 \times 4$ w/ SN                      | $8 \times 8 \times 8N_d$                                                    | $h_1$ ( $3 \times 3 \times 8N_d$ )           |
|       | Conv $1 \times 1$ w/ SN (unconditional loss) | $h_1$                                                                       | $3 \times 3$                                 |
| $D_2$ | Shape Encoder w/ SN ( $\frac{1}{8}N_d$ )     | $M^2$ ( $256 \times 256 \times N_c$ )                                       | $256 \times 256 \times \frac{1}{8}N_d$       |
|       | Concat                                       | $x_2$ ( $256 \times 256 \times 3$ ), $256 \times 256 \times \frac{1}{8}N_d$ | $256 \times 256 \times (3 + \frac{1}{8}N_d)$ |
|       | Downsampling w/ SN ( $N_d$ )                 | $256 \times 256 \times (3 + \frac{1}{8}N_d)$                                | $128 \times 128 \times N_d$                  |
|       | Downsampling w/ SN ( $2N_d$ )                | $128 \times 128 \times N_d$                                                 | $64 \times 64 \times 2N_d$                   |
|       | Downsampling w/ SN ( $4N_d$ )                | $64 \times 64 \times 2N_d$                                                  | $32 \times 32 \times 4N_d$                   |
|       | Downsampling w/ SN ( $8N_d$ )                | $32 \times 32 \times 4N_d$                                                  | $16 \times 16 \times 8N_d$                   |
|       | Conv $4 \times 4$ w/ SN                      | $16 \times 16 \times 8N_d$                                                  | $h_2$ ( $7 \times 7 \times 8N_d$ )           |
|       | Conv $1 \times 1$ w/ SN (unconditional loss) | $h_2$                                                                       | $7 \times 7$                                 |

Table 9: The structure for object-wise spectral normalized projection discriminators of Obj-GAN.  $c^{\text{obj}}$  represents the intermediate context vectors of  $F^{\text{obj-attn}}$ , and  $e^g$  represents the embedding vectors the class labels.

| Stage | Name                                         | Input Tensors                                                                     | Output Tensors                                   |
|-------|----------------------------------------------|-----------------------------------------------------------------------------------|--------------------------------------------------|
| small | Interpolating (2)                            | $M^2 (256 \times 256 \times N_c)$                                                 | $512 \times 512 \times N_c$                      |
|       | Interpolating (2)                            | $x^2 (256 \times 256 \times 3)$                                                   | $512 \times 512 \times 3$                        |
|       | Shape Encoder w/ SN ( $\frac{1}{8}N_d$ )     | $512 \times 512 \times N_c$                                                       | $512 \times 512 \times \frac{1}{8}N_d$           |
|       | Concat                                       | $512 \times 512 \times 3, 512 \times 512 \times \frac{1}{8}N_d$                   | $512 \times 512 \times (3 + \frac{1}{8}N_d)$     |
|       | Downsampling w/ SN ( $N_d$ )                 | $512 \times 512 \times (3 + \frac{1}{8}N_d)$                                      | $256 \times 256 \times N_d$                      |
|       | Downsampling w/ SN ( $2N_d$ )                | $256 \times 256 \times N_d$                                                       | $128 \times 128 \times 2N_d$                     |
|       | Downsampling w/ SN ( $4N_d$ )                | $128 \times 128 \times 2N_d$                                                      | $64 \times 64 \times 4N_d$                       |
|       | ROI Align (5)                                | $64 \times 64 \times 4N_d$                                                        | $N_{\text{small}} \times 5 \times 5 \times 4N_d$ |
|       | ROI Encoder w/SN (5)                         | $N_{\text{small}} \times 5 \times 5 \times 4N_d$                                  | $N_{\text{small}} \times 4 \times 4 \times 4N_d$ |
|       | Conv $4 \times 4$ w/ SN                      | $N_{\text{small}} \times 4 \times 4 \times 4N_d$                                  | $h (N_{\text{small}} \times 4N_d)$               |
|       | Concat                                       | $c^{\text{obj}} (N_{\text{small}} \times N_g), e^g (N_{\text{small}} \times N_l)$ | $N_{\text{small}} \times (N_g + N_l)$            |
|       | FC w/ SN ( $4N_d$ )                          | $N_{\text{small}} \times (N_g + N_l)$                                             | $c (N_{\text{small}} \times 4N_d)$               |
|       | Fmap Mul - Avg Pool (1)                      | $h, c$                                                                            | $hc (N_{\text{small}})$                          |
|       | Conv $1 \times 1$ w/ SN (unconditional loss) | $h$                                                                               | $o^{\text{uncond}} (N_{\text{small}})$           |
|       | Fmap Sum (conditional loss)                  | $o^{\text{uncond}}, hc$                                                           | $o^{\text{cond}} (N_{\text{small}})$             |
| large | Interpolating (2)                            | $M^2 (256 \times 256 \times N_c)$                                                 | $512 \times 512 \times N_c$                      |
|       | Interpolating (2)                            | $x^2 (256 \times 256 \times 3)$                                                   | $512 \times 512 \times 3$                        |
|       | Shape Encoder w/ SN ( $\frac{1}{8}N_d$ )     | $512 \times 512 \times N_c$                                                       | $512 \times 512 \times \frac{1}{8}N_d$           |
|       | Concat                                       | $512 \times 512 \times 3, 512 \times 512 \times \frac{1}{8}N_d$                   | $512 \times 512 \times (3 + \frac{1}{8}N_d)$     |
|       | Downsampling w/ SN ( $N_d$ )                 | $512 \times 512 \times (3 + \frac{1}{8}N_d)$                                      | $256 \times 256 \times N_d$                      |
|       | Downsampling w/ SN ( $2N_d$ )                | $256 \times 256 \times N_d$                                                       | $128 \times 128 \times 2N_d$                     |
|       | Downsampling w/ SN ( $4N_d$ )                | $128 \times 128 \times 2N_d$                                                      | $64 \times 64 \times 4N_d$                       |
|       | Downsampling w/ SN ( $8N_d$ )                | $64 \times 64 \times 4N_d$                                                        | $32 \times 32 \times 8N_d$                       |
|       | ROI Align (5)                                | $32 \times 32 \times 8N_d$                                                        | $N_{\text{large}} \times 5 \times 5 \times 8N_d$ |
|       | ROI Encoder w/ SN (5)                        | $N_{\text{large}} \times 5 \times 5 \times 8N_d$                                  | $N_{\text{large}} \times 4 \times 4 \times 4N_d$ |
|       | Conv $4 \times 4$ w/ SN                      | $N_{\text{large}} \times 4 \times 4 \times 4N_d$                                  | $h (N_{\text{large}} \times 4N_d)$               |
|       | Concat                                       | $c^{\text{obj}} (N_{\text{large}} \times N_g), e^g (N_{\text{large}} \times N_l)$ | $N_{\text{large}} \times (N_g + N_l)$            |
|       | FC w/ SN ( $4N_d$ )                          | $N_{\text{large}} \times (N_g + N_l)$                                             | $c (N_{\text{large}} \times 4N_d)$               |
|       | Fmap Mul - Avg Pool (1)                      | $h, c$                                                                            | $hc (N_{\text{large}})$                          |
|       | Conv $1 \times 1$ w/ SN (unconditional loss) | $h$                                                                               | $o^{\text{uncond}} (N_{\text{large}})$           |
|       | Fmap Sum (conditional loss)                  | $o^{\text{uncond}}, hc$                                                           | $o^{\text{cond}} (N_{\text{large}})$             |

## References

- [1] S. Hong, D. Yang, J. Choi, and H. Lee. Inferring semantic layout for hierarchical text-to-image synthesis. *arXiv preprint arXiv:1801.05091*, 2018. [9](#)
- [2] T. Miyato, T. Kataoka, M. Koyama, and Y. Yoshida. Spectral normalization for generative adversarial networks. *arXiv preprint arXiv:1802.05957*, 2018. [12](#)
- [3] T. Miyato and M. Koyama. cgans with projection discriminator. *arXiv preprint arXiv:1802.05637*, 2018. [12](#)
- [4] O. Russakovsky, J. Deng, H. Su, J. Krause, S. Satheesh, S. Ma, Z. Huang, A. Karpathy, A. Khosla, M. Bernstein, A. C. Berg, and L. Fei-Fei. ImageNet Large Scale Visual Recognition Challenge. *IJCV*, 115(3):211–252, 2015. [7](#)
- [5] M. Schuster and K. K. Paliwal. Bidirectional recurrent neural networks. *IEEE Trans. Signal Processing*, 45(11):2673–2681, 1997. [7](#)
- [6] C. Szegedy, V. Vanhoucke, S. Ioffe, J. Shlens, and Z. Wojna. Rethinking the inception architecture for computer vision. In *CVPR*, 2016. [7](#)
- [7] T. Xu, P. Zhang, Q. Huang, H. Zhang, Z. Gan, X. Huang, and X. He. Attngan: Fine-grained text to image generation with attentional generative adversarial networks. *arXiv preprint arXiv:1711.10485*, 2017. [7](#)
